# Supplementary material
Source: PubMed Central journal article supplement (PMC3404234)
Supplement: NIHMS378655-supplement-01.pdf [file NIHMS378655-supplement-01.pdf]

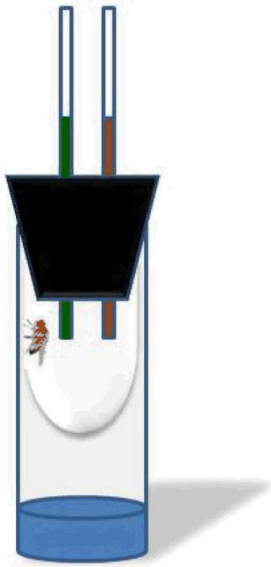

**Supplemental Figure 1. Schematic of two-choices CAFE assay (not to scale).** A single male fly was housed in inner vial, with water in outer vial, to keep a high humidity inside. Two kinds of liquid food were provided to the fly through two capillaries separately. One contains 5% sucrose and 5% yeast extract, which is represented by green color. The other contains 5% sucrose, 5% yeast extract and ethanol in a certain concentration, which is represented by red color. The two capillaries were replaced every 24 h with their locations were exchanged.

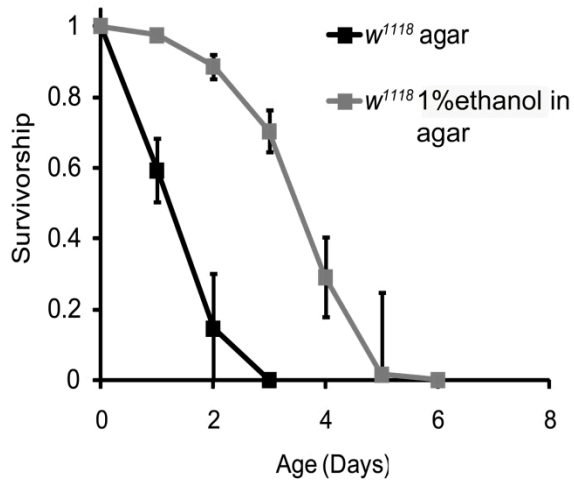

**Supplemental Figure 2. Ethanol is not an efficient energy source for *Drosophila*.**

$w^{1118}$  mutants in a Canton-S genetic background did not survive as long on agar as flies fed with 1% ethanol. Consistent with the data for wild-type Canton-S, the ethanol fed flies did not survive for very long. Hence, ethanol can be used as a food substrate by these flies, but not efficiently. Each data point is mean  $\pm$ S.E.M.

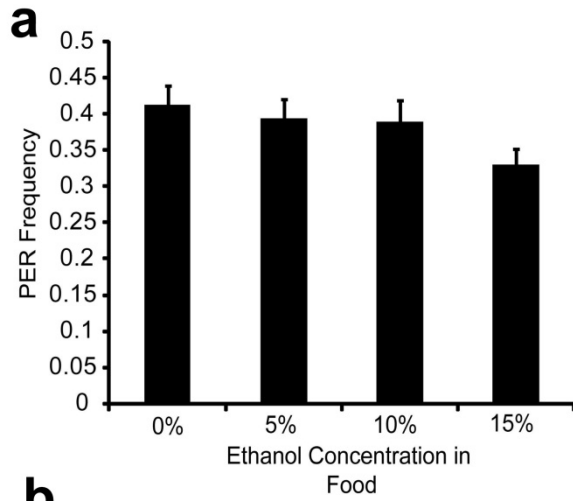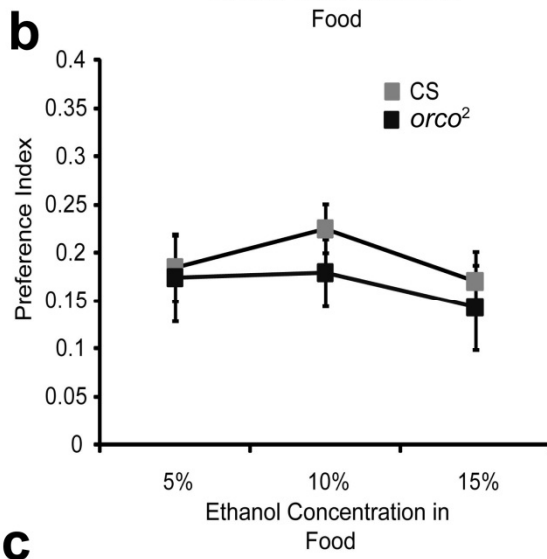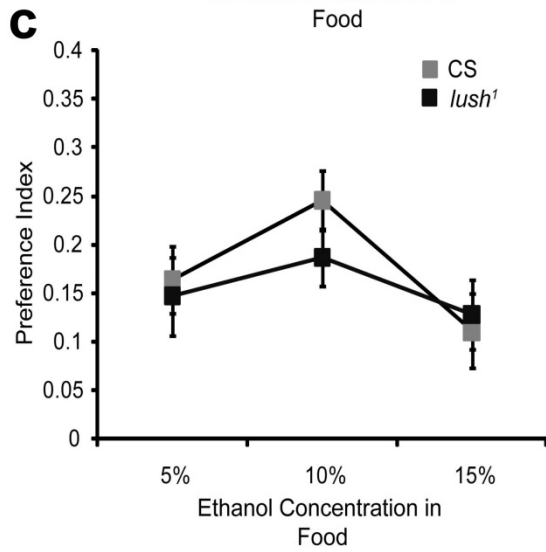

**Supplemental Figure 3. Ethanol preference in the CAFE assay does not rely on gustatory or olfactory attraction.** (a) The PER index of Canton-S flies was not different between liquid food without ethanol and liquid food with 5%, 10% or 15% ethanol, which suggested that ethanol was not an appetitive gustatory cue. (b) The *orco*<sup>2</sup> mutant ethanol preference to 5%, 10% or 15% ethanol are not significantly different from the ethanol preferences of Canton-S. (c) The ethanol preferences of *lush*<sup>1</sup> to 5%, 10% or 15% ethanol are not significantly different from the preferences of Canton-S. (b) and (c) suggest that ethanol preference on *Drosophila* is not due to olfactory attraction of ethanol. Data are mean  $\pm$ S.E.M.

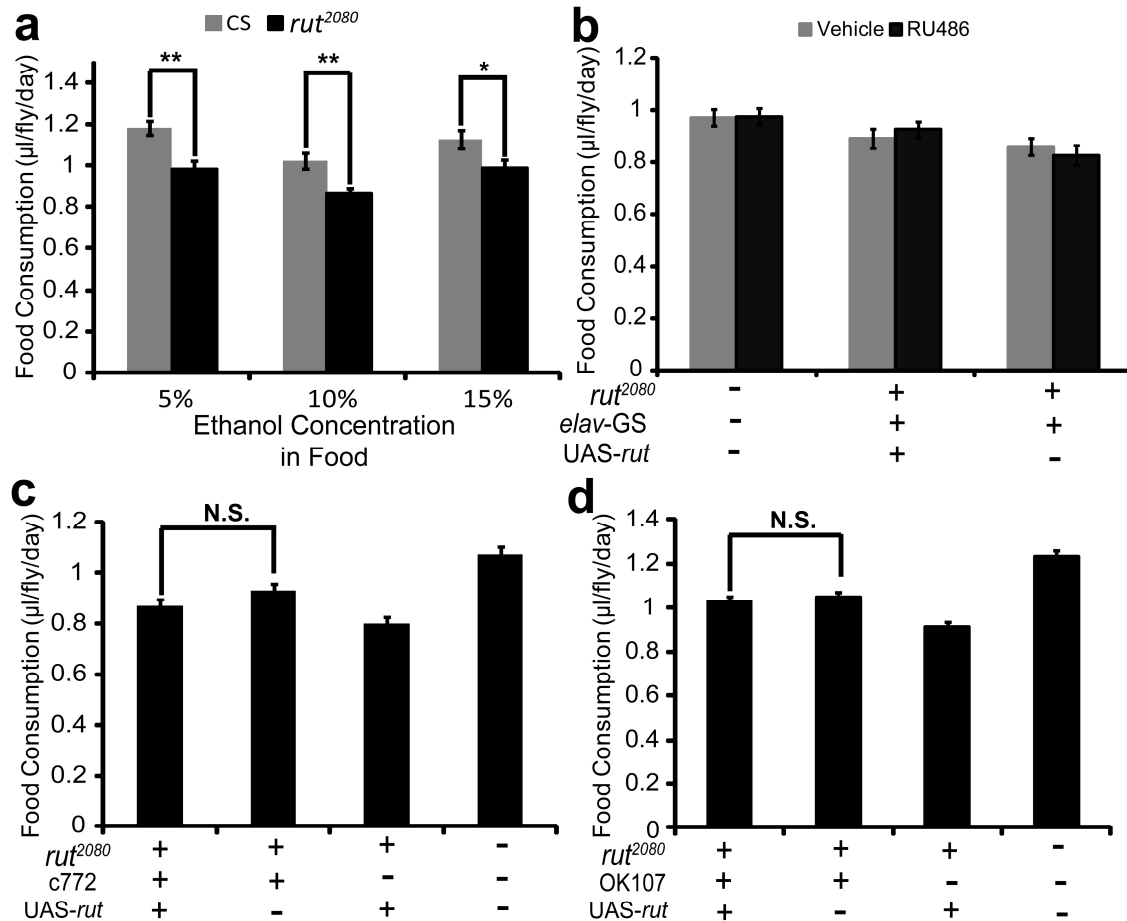

**Supplemental Figure 4. The decreased ethanol preference in *rut*<sup>2080</sup> is not due to decreased food consumption.** (a) In the CAFE assay, *rut*<sup>2080</sup> consumed significantly less food than CS at each ethanol concentration. (b) This defect in food consumption was not increased significantly by the post-developmental expression of a wild-type *rut* cDNA in the nervous system with the *elav*-GS driver. However, the same treatment (RU486 feeding) induced a higher ethanol preference than the vehicle-feeding group (see Figure 2). (c)(d) The defect in food consumption was not rescued by the *rutabaga* expression driven by the OK107 or *c772* Gal4 driver. However, this defect of ethanol preference in *rut*<sup>2080</sup> was rescued by OK107 or *c772* driven *rutabaga* expression in mushroom body (see Figure 4). (b)(c)(d) indicated that the *rut*<sup>2080</sup> ethanol preference phenotype is independent of the total food consumption phenotype. Data are mean  $\pm$  S.E.M. “N.S.” means no significance. \*\* $P < 0.01$  and \*\*\* $P < 0.001$ . Because the negative control *rut*<sup>2080</sup>; +; 238y and *rut*<sup>2080</sup>; c305a/+; MB247/+ genotype displayed no difference with CS

in food consumption (data not shown), these results cannot indicate whether the two phenotypes are independent of each other in *rut*<sup>2080</sup> or not.

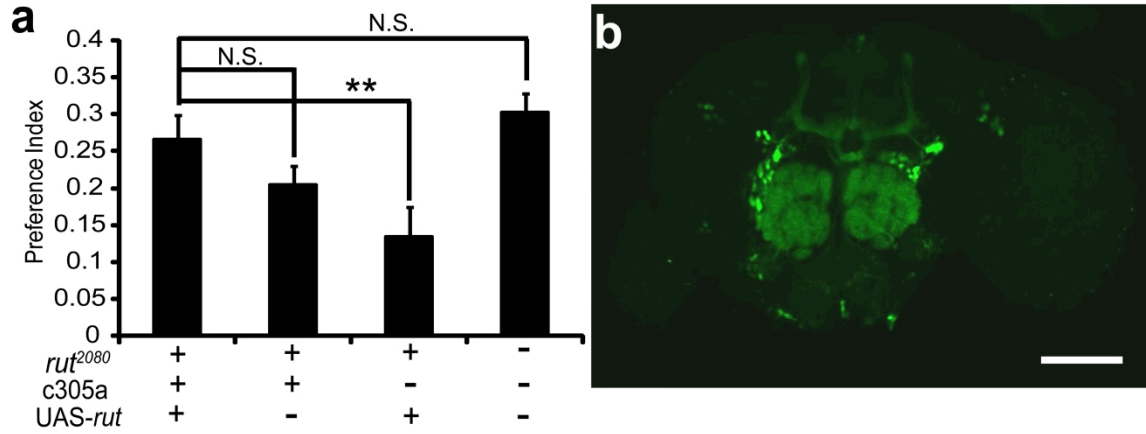

**Supplemental Figure 5. The expression of *rutabaga* in the  $\alpha'/\beta'$  lobe neurons alone is not sufficient for a full rescue of the *rut*<sup>2080</sup> ethanol preference phenotype (a) The expression of *UAS-rut* driven by the *c305a*  $\alpha'/\beta'$  Gal4 drive was not sufficient to fully rescue the *rut*<sup>2080</sup> ethanol preference phenotype. The *rut*<sup>2080</sup>; *c305a*/+; *UAS-rut* ethanol preference phenotype was not significantly different than CS, and was significantly higher than one control, *rut*<sup>2080</sup>; *UAS-rut*/+ genotype. However, because it was not significantly different than the *rut*<sup>2080</sup>; *c305a*/+ genotype control, it's still a question whether the *rutabaga* expression in  $\alpha'/\beta'$  lobe is required for ethanol preference or not. Data are mean  $\pm$ S.E.M. "N.S." means no significance. (b) *c305a* Gal4 drives the GFP expression in the  $\alpha'/\beta'$  lobe mushroom body neurons. Scale bar: 100  $\mu$ m.**
